# Supplementary material for: Prevalence of Pathogenic and Potentially Pathogenic Inborn Error of Immunity Associated Variants in Children with Severe Sepsis
Source: Research Square preprint supplement (doi:10.21203/rs.3.rs-366797/v1), 2021-04-01
Supplement: Supplementary file 1 [file 7a222377564ed1124d6895f2.docx]

| **Variant** | **MAF Ratio:**  **Sepsis /**  **gnomAD, (N)** | **Adj**  ***p*-value** | **MAF Ratio:**  **African**  **American**  **Sepsis /**  **Non-African**  **American**  **Sepsis, (N)** | **Adj**  ***p*-value** | **MAF Ratio:**  **African**  **American**  **Sepsis /**  **gnomAD**  **African,**  **(N)** | **Adj**  ***p*-value** |
| --- | --- | --- | --- | --- | --- | --- |
| *C3* c.1407G>C  p.Glu469Asp | 4.7,  (N= 14) | 1.1x10-7 | 22.3,  (N = 12) | 2.0x10-6 |  |  |
| *C3* c.443G>A  p.Arg148Gln | 214.2,  (N = 1) | 4.1 x10-7 |  |  | 0.014/0,  (N = 1) | 3.7x10-9 |
| *CFH* c.2850G>T  p.Gln950His |  |  |  |  | 17.8,  (N = 2) | 9.3x10-9 |
| *CFHR3* c.424C>T  p.Arg142Cys | 2.9,  (N = 15) | 6.1 x10-3 | 14.9,  (N = 12) | 1.3x10-5 |  |  |
| *CFHR5* c.434G>A  p.Gly145Glu |  |  | 29.7,  (N = 8) | 5.2x10-4 |  |  |
| *IRF3* c.829G>A  p.Ala277Thr | 3.4,  (N = 9) | 0.04 |  |  |  |  |
| *TNFRSF1A* c.224C>T p.Pro75Leu |  |  | 18.6,  (N = 10) | 8.4x10-5 |  |  |
