# Supplementary material for: Prevalence of Pathogenic and Potentially Pathogenic Inborn Error of Immunity Associated Variants in Children with Severe Sepsis
Source: Research Square preprint supplement (doi:10.21203/rs.3.rs-366797/v1), 2021-04-01
Supplement: Supplementary file 2 [file 8dacf44c76efb63d852043e4.xlsx]

## Sheet: IUIS_2017_list
Gene	IUIS Classification	Genetic Defect	Inheritance OMIM	OMIM
BTK	Predominantly antibody deficiencies	BTK deficiency, X-linked agammaglobulinemia (XLA)	XLR	300300
IGHM	Predominantly antibody deficiencies	μ heavy chain deficiency	AR	147020
IGLL1	Predominantly antibody deficiencies	λ5 deficiency	AR	146770
CD79A	Predominantly antibody deficiencies	Igα deficiency	AR	112205
CD79B	Predominantly antibody deficiencies	Igβ deficiency	AR	147245
BLNK	Predominantly antibody deficiencies	BLNK deficiency	AR	604515
PIK3R1	Predominantly antibody deficiencies	PIK3R1 deficiency	AD or AR	171833
TCF3	Predominantly antibody deficiencies	E47 transcription factor deficiency	AD	147141
PIK3CD GOF	Predominantly antibody deficiencies	PIK3CD mutation (GOF)	AD	602839
PIK3R1	Predominantly antibody deficiencies	PIK3R1 deficiency (LOF)	AD	616005
PTEN	Predominantly antibody deficiencies	PTEN Deficiency (LOF)	AD	601728
CD19	Predominantly antibody deficiencies	CD19 deficiency	AR	107265
CD81	Predominantly antibody deficiencies	CD81 deficiency	AR	186845
MS4A1	Predominantly antibody deficiencies	CD20 deficiency	AR	112210
CR2	Predominantly antibody deficiencies	CD21 deficiency	AR	120650
TNFRSF13B (TACI)	Predominantly antibody deficiencies	TACI deficiency	AD or AR	604907
TNFRSF13C (BAFF-R)	Predominantly antibody deficiencies	BAFF receptor deficiency	AR	606269
TNFSF12	Predominantly antibody deficiencies	TWEAK deficiency	AD	602695
MOGS (GCS1)	Predominantly antibody deficiencies	Mannosyl-oligosaccharide glucosidase deficiency (MOGS)	AR	601336
TRNT1	Predominantly antibody deficiencies	TRNT1 deficiency	AR	612907
TTC37	Predominantly antibody deficiencies	TTC37 deficiency	AR	614649
NFKB1	Predominantly antibody deficiencies	NFKB1 deficiency	AD	164011
NFKB2	Predominantly antibody deficiencies	NFKB2 deficiency	AD	615577
IKZF1	Predominantly antibody deficiencies	IKAROS deficiency	AD	603023
IRF2BP2	Predominantly antibody deficiencies	IRF2BP2 deficiency	AD	615332
ATP6AP1	Predominantly antibody deficiencies	ATP6AP1 deficiency	XL	300197
AICDA	Predominantly antibody deficiencies	AID deficiency	AR	605257
UNG	Predominantly antibody deficiencies	UNG deficiency	AR	191525
INO80	Predominantly antibody deficiencies	INO80	AR	610169
MSH6	Predominantly antibody deficiencies	MSH6	AR	600678
IGKC	Predominantly antibody deficiencies	Kappa chain deficiency	AR	147200
CARD11	Predominantly antibody deficiencies	CARD11 GOF	AD GOF	607210
PRF1	Diseases of immune dysregulation	Perforin deficiency (FHL2)	AR	170280
UNC13D	Diseases of immune dysregulation	UNC13D/Munc13-4 deficiency (FHL3)	AR	608897
STX11	Diseases of immune dysregulation	Syntaxin 11 deficiency (FHL4)	AR	605014
STXBP2	Diseases of immune dysregulation	STXBP2/Munc18-2 deficiency (FHL5)	AR or AD	601717
FAAP24	Diseases of immune dysregulation	FAAP24 deficiency	AR	610884
LYST	Diseases of immune dysregulation	Chediak-Higashi syndrome	AR	606897
RAB27A	Diseases of immune dysregulation	Griscelli syndrome, type 2	AR	603868
AP3B1	Diseases of immune dysregulation	Hermansky-Pudlak syndrome, type 2	AR	603401
AP3D1	Diseases of immune dysregulation	Hermansky-Pudlak syndrome, type 10	AR	617050
FOXP3	Diseases of immune dysregulation	IPEX, immune dysregulation, polyendocrinopathy, enteropathy X-linked	XL	300292
IL2RA	Diseases of immune dysregulation	CD25 deficiency	AR	147730
CTLA4	Diseases of immune dysregulation	CTLA4 deficiency (ALPSV)	AD	123890
LRBA	Diseases of immune dysregulation	LRBA deficiency	AR	606453
STAT3	Diseases of immune dysregulation	STAT3 GOF mutation	AD (GOF)	102582
BACH2	Diseases of immune dysregulation	BACH2 deficiency	AD	605394
AIRE	Diseases of immune dysregulation	APECED (APS-1), autoimmune polyendocrinopathy with candidiasis and ectodermal dystrophy	AR or AD	607358
ITCH	Diseases of immune dysregulation	ITCH deficiency	AR	606409
ZAP70	Diseases of immune dysregulation	ZAP-70 combined hypomorphic and activation mutations	AR (LOF/GOF)	176947
TPP2	Diseases of immune dysregulation	Tripeptidyl-peptidase II deficiency	AR	190470
JAK1	Diseases of immune dysregulation	JAK1 GOF	AD GOF	147795
PEPD	Diseases of immune dysregulation	Prolidase deficiency	AR	613230
TNFRSF6 (FAS)	Diseases of immune dysregulation	ALPS-FAS	AD or AR	134637
FASLG	Diseases of immune dysregulation	ALPS-FASLG	AR	134638
CASP10	Diseases of immune dysregulation	ALPS-caspase 10	AD	601762
CASP8	Diseases of immune dysregulation	ALPS-caspase 8	AR	601763
FADD	Diseases of immune dysregulation	FADD deficiency	AR	602457
IL10	Diseases of immune dysregulation	IL-10 deficiency	AR	124092
IL10RA	Diseases of immune dysregulation	IL-10Ra deficiency	AR	146933
IL10RB	Diseases of immune dysregulation	IL-10Rb deficiency	AR	123889
NFAT5	Diseases of immune dysregulation	NFAT5 haploinsufficiency	AD	604708
SH2D1A	Diseases of immune dysregulation	SH2D1A deficiency (XLP1)	XL	300490
XIAP	Diseases of immune dysregulation	XIAP deficiency (XLP2)	XL	300079
CD27	Diseases of immune dysregulation	CD27 deficiency	AR	615122
CTPS1	Diseases of immune dysregulation	CTPS1 deficiency	AR	615897
RASGRP1	Diseases of immune dysregulation	RASGRP1 deficiency	AR	603962
CD70 (TNFSF7)	Diseases of immune dysregulation	CD70 deficiency	AR	602840
RLTPR	Diseases of immune dysregulation	RLTPR (CARMIL2) deficiency	AR	610859
ITK	Diseases of immune dysregulation	ITK deficiency	AR	186973
MAGT1	Diseases of immune dysregulation	MAGT1 deficiency (XMEN)	XL	300853
PRKCD	Diseases of immune dysregulation	PRKCD deficiency	AR	176977
IL2RG	Immunodeficiencies affecting cellular and humoral immunity	γc deficiency (common gamma chain SCID, CD132 deficiency)	XL	308380
JAK3	Immunodeficiencies affecting cellular and humoral immunity	JAK3 deficiency	AR	600173
IL7R	Immunodeficiencies affecting cellular and humoral immunity	IL7Rα deficiency	AR	146661
PTPRC	Immunodeficiencies affecting cellular and humoral immunity	CD45 deficiency	AR	151460
CD3D	Immunodeficiencies affecting cellular and humoral immunity	CD3δ deficiency	AR	186790
CD3E	Immunodeficiencies affecting cellular and humoral immunity	CD3ε deficiency	AR	186830
CD247	Immunodeficiencies affecting cellular and humoral immunity	CD3ζ deficiency	AR	186780
CORO1A	Immunodeficiencies affecting cellular and humoral immunity	Coronin-1A deficiency	AR	605000
LAT	Immunodeficiencies affecting cellular and humoral immunity	LAT deficiency	AR	602354
RAG1	Immunodeficiencies affecting cellular and humoral immunity	RAG1 deficiency	AR	179615
RAG2	Immunodeficiencies affecting cellular and humoral immunity	RAG2 deficiency	AR	179616
DCLRE1C	Immunodeficiencies affecting cellular and humoral immunity	DCLRE1C (Artemis) deficiency	AR	605988
PRKDC	Immunodeficiencies affecting cellular and humoral immunity	DNA PKcs deficiency	AR	176977
NHEJ1	Immunodeficiencies affecting cellular and humoral immunity	Cernunnos/XLF deficiency	AR	611290
LIG4	Immunodeficiencies affecting cellular and humoral immunity	DNA ligase IV deficiency	AR	601837
AK2	Immunodeficiencies affecting cellular and humoral immunity	Reticular dysgenesis	AR	103020
ADA	Immunodeficiencies affecting cellular and humoral immunity	Adenosine deaminase (ADA) deficiency	AR	608958
DOCK2	Immunodeficiencies affecting cellular and humoral immunity	DOCK2 deficiency	AR	603122
CD40LG (TNFSF5)	Immunodeficiencies affecting cellular and humoral immunity	CD40 ligand deficiency (CD154)	XL	300386
CD40 (TNFRSF5)	Immunodeficiencies affecting cellular and humoral immunity	CD40 deficiency	AR	109535
ICOS	Immunodeficiencies affecting cellular and humoral immunity	ICOS deficiency	AR	604558
CD3G	Immunodeficiencies affecting cellular and humoral immunity	CD3γ deficiency	AR	186740
CD8A	Immunodeficiencies affecting cellular and humoral immunity	CD8 deficiency	AR	186910
ZAP70	Immunodeficiencies affecting cellular and humoral immunity	ZAP-70 deficiency (ZAP70 LOF)	AR	176947
TAP1	Immunodeficiencies affecting cellular and humoral immunity	MHC class I deficiency	AR	170260
TAP2	Immunodeficiencies affecting cellular and humoral immunity	MHC class I deficiency	AR	170261
TAPBP	Immunodeficiencies affecting cellular and humoral immunity	MHC class I deficiency	AR	601962
B2M	Immunodeficiencies affecting cellular and humoral immunity	MHC class I deficiency	AR	109700
CIITA	Immunodeficiencies affecting cellular and humoral immunity	MHC class II deficiency group A	AR	600005
RFXANK	Immunodeficiencies affecting cellular and humoral immunity	MHC class II deficiency group B	AR	603200
RFX5	Immunodeficiencies affecting cellular and humoral immunity	MHC class II deficiency group C	AR	601863
RFXAP	Immunodeficiencies affecting cellular and humoral immunity	MHC class II deficiency group D	AR	601861
DOCK8	Immunodeficiencies affecting cellular and humoral immunity	DOCK8 deficiency	AR	243700
RHOH	Immunodeficiencies affecting cellular and humoral immunity	Rhoh deficiency	AR	602037
STK4	Immunodeficiencies affecting cellular and humoral immunity	MST1 deficiency	AR	614868
TRAC	Immunodeficiencies affecting cellular and humoral immunity	TCRα deficiency	AR	615387
LCK	Immunodeficiencies affecting cellular and humoral immunity	LCK deficiency	AR	615758
MALT1	Immunodeficiencies affecting cellular and humoral immunity	MALT1 deficiency	AR	615468
CARD11	Immunodeficiencies affecting cellular and humoral immunity	CARD11 deficiency (LOF)	AR	615206
BCL10	Immunodeficiencies affecting cellular and humoral immunity	BCL10 deficiency	AR	616098
BCL11B	Immunodeficiencies affecting cellular and humoral immunity	BCL11B deficiency	AD	617237
IL21	Immunodeficiencies affecting cellular and humoral immunity	IL-21 deficiency	AR	615767
IL21R	Immunodeficiencies affecting cellular and humoral immunity	IL-21R deficiency	AR	615207
TNFRSF4	Immunodeficiencies affecting cellular and humoral immunity	OX40 deficiency	AR	615593
IKBKB	Immunodeficiencies affecting cellular and humoral immunity	IKBKB deficiency	AR	615592
MAP3K14	Immunodeficiencies affecting cellular and humoral immunity	NIK deficiency	AR	604655
RELB	Immunodeficiencies affecting cellular and humoral immunity	RelB deficiency	AR	604758
MSN	Immunodeficiencies affecting cellular and humoral immunity	Moesin deficiency	XL	300988
TFRC	Immunodeficiencies affecting cellular and humoral immunity	TFRC deficiency	AR	616740
WAS	Combined immunodeficiencies with associated or syndromic features	Wiskott-Aldrich syndrome (WAS LOF)	XL	300392
WIPF1	Combined immunodeficiencies with associated or syndromic features	WIP deficiency	AR	602357
ARPC1B	Combined immunodeficiencies with associated or syndromic features	ARPC1B deficiency	AR	604223
ATM	Combined immunodeficiencies with associated or syndromic features	Ataxia-telangiectasia	AR	607585
NBS1	Combined immunodeficiencies with associated or syndromic features	Nijmegen breakage syndrome	AR	602667
BLM (RECQL3)	Combined immunodeficiencies with associated or syndromic features	Bloom Syndrome	AR	604610
DNMT3B	Combined immunodeficiencies with associated or syndromic features	Immunodeficiency with centromeric instability and facial anomalies, ICF1	AR	602900
ZBTB24	Combined immunodeficiencies with associated or syndromic features	Immunodeficiency with centromeric instability and facial anomalies, ICF2	AR	614064
CDCA7	Combined immunodeficiencies with associated or syndromic features	Immunodeficiency with centromeric instability and facial anomalies, ICF3	AR	609937
HELLS	Combined immunodeficiencies with associated or syndromic features	Immunodeficiency with centromeric instability and facial anomalies, ICF4	AR	603946
PMS2	Combined immunodeficiencies with associated or syndromic features	PMS2 deficiency	AR	600259
RNF168	Combined immunodeficiencies with associated or syndromic features	RNF168 deficiency (radiosensitivity, immune deficiency, dysmorphic features, learning difficulties [RIDDLE] syndrome)	AR	612688
MCM4	Combined immunodeficiencies with associated or syndromic features	MCM4 deficiency	AR	602638
POLE	Combined immunodeficiencies with associated or syndromic features	POLE1 (polymerase ε subunit 1) deficiency (FILS syndrome)	AR	174762
POLE2	Combined immunodeficiencies with associated or syndromic features	POLE2 (polymerase ε subunit 2) deficiency	AR	602670
LIG1	Combined immunodeficiencies with associated or syndromic features	Ligase I deficiency	AR	126391
NSMCE3	Combined immunodeficiencies with associated or syndromic features	NSMCE3 deficiency	AR	608243
ERCC6L2	Combined immunodeficiencies with associated or syndromic features	ERCC6L2 (Hebo deficiency)	AR	615667
GINS1	Combined immunodeficiencies with associated or syndromic features	GINS1 deficiency	AR	610608
Large deletion (3 Mb) typically in chromosome 22	Combined immunodeficiencies with associated or syndromic features	DiGeorge/velocardiofacial syndrome	AD	602054
TBX1	Combined immunodeficiencies with associated or syndromic features	TBX1 deficiency	AD	602054
CHD7	Combined immunodeficiencies with associated or syndromic features	CHARGE syndrome due to CHD7 deficiency	AD	608892
SEMA3E	Combined immunodeficiencies with associated or syndromic features	CHARGE syndrome due to SEMA3E deficiency	AD	608166
FOXN1	Combined immunodeficiencies with associated or syndromic features	Winged helix nude FOXN1 deficiency	AR	600838
RMRP	Combined immunodeficiencies with associated or syndromic features	Cartilage hair hypoplasia (CHH)	AR	157660
SMARCAL1	Combined immunodeficiencies with associated or syndromic features	Schimke immuno-osseous dysplasia	AR	606622
MYSM1	Combined immunodeficiencies with associated or syndromic features	MYSM1 deficiency	AR	612176
RNU4ATAC	Combined immunodeficiencies with associated or syndromic features	MOPD1 deficiency	AR	601428
EXTL3	Combined immunodeficiencies with associated or syndromic features	EXTL3 deficiency	AR	617425
STAT3	Combined immunodeficiencies with associated or syndromic features	AD-HIES	AD LOF	102582
SPINK5	Combined immunodeficiencies with associated or syndromic features	Comel-Netherton syndrome	AR	605010
PGM3	Combined immunodeficiencies with associated or syndromic features	PGM3 deficiency	AR	172100
DKC1	Combined immunodeficiencies with associated or syndromic features	XL-DKC due to dyskerin deficiency	XL	300126
NHP2	Combined immunodeficiencies with associated or syndromic features	AR-DKC due to nucleolar protein family A member 2 (NHP2) deficiency	AR	606470
NOP10	Combined immunodeficiencies with associated or syndromic features	AR-DKC due to nucleolar protein family A member 3 (NHP3) or NOP10 deficiency	AR	606471
RTEL1	Combined immunodeficiencies with associated or syndromic features	AD/AR-DKC due to regulator of telomere elongation (RTEL1) deficiency	AD or AR	608833
TERC	Combined immunodeficiencies with associated or syndromic features	AD-DKC due to TERC deficiency	AD	602322
TERT	Combined immunodeficiencies with associated or syndromic features	AD/AR-DKC due to TERT deficiency	AD or AR	187270
TINF2	Combined immunodeficiencies with associated or syndromic features	AD-DKC due to TINF2 deficiency	AD or AR	604319
TPP1	Combined immunodeficiencies with associated or syndromic features	AD/AR-DKC due to TPP1 deficiency	AD or AR	609377
DCLRE1B/SNM1/APOLLO:	Combined immunodeficiencies with associated or syndromic features	AR-DKC due to DCLRE1B deficiency	AR	609683
PARN	Combined immunodeficiencies with associated or syndromic features	AR-DKC due to PARN deficiency	AR (AD?)	604212
WRAP53	Combined immunodeficiencies with associated or syndromic features	AR-DKC due to WRAP53 deficiency	AR	612661
STN1	Combined immunodeficiencies with associated or syndromic features	Coats plus syndrome due to STN1 deficiency	AR	613128
CTC1	Combined immunodeficiencies with associated or syndromic features	Coats plus syndrome due to CTC1 deficiency	AR	613129
SAMD9	Combined immunodeficiencies with associated or syndromic features	SAMD9	AD (GOF)	617053
SAMD9L	Combined immunodeficiencies with associated or syndromic features	SAMD9L	AD (GOF)	159550
TCN2	Combined immunodeficiencies with associated or syndromic features	Transcobalamin 2 deficiency	AR	613441
SLC46A1	Combined immunodeficiencies with associated or syndromic features	SLC46A1/PCFT deficiency causing hereditary folate malabsorption	AR	229050
MTHFD1	Combined immunodeficiencies with associated or syndromic features	Methylene-tetrahydrofolate dehydrogenase 1 (MTHFD1) deficiency	AR	172460
NEMO (IKBKG)	Combined immunodeficiencies with associated or syndromic features	EDA-ID due to NEMO /IKBKG deficiency (ectodermal dysplasia, immune deficiency)	XL	300248
IKBA (NFKBIA)	Combined immunodeficiencies with associated or syndromic features	EDA-ID due to IKBA GOF mutation	AD GOF	164008
ORAI1	Combined immunodeficiencies with associated or syndromic features	ORAI-1 deficiency	AR	610277
STIM1	Combined immunodeficiencies with associated or syndromic features	STIM1 deficiency	AR	605921
PNP	Combined immunodeficiencies with associated or syndromic features	Purine nucleoside phosphorylase (PNP) deficiency	AR	164050
TTC7A	Combined immunodeficiencies with associated or syndromic features	Immunodeficiency with multiple intestinal atresias	AR	609332
SP110	Combined immunodeficiencies with associated or syndromic features	Hepatic veno-occlusive disease with immunodeficiency (VODI)	AR	604457
EPG5	Combined immunodeficiencies with associated or syndromic features	Vici syndrome due to EPG5 deficiency	AR	615068
HOIL1 (RBCK1)	Combined immunodeficiencies with associated or syndromic features	HOIL1 deficiency	AR	610924
RNF31	Combined immunodeficiencies with associated or syndromic features	HOIP deficiency	AR	612487
CCBE1	Combined immunodeficiencies with associated or syndromic features	Hennekam-lymphangiectasia-lymphedema syndrome due to CCBE1 deficiency	AR	612753
FAT4	Combined immunodeficiencies with associated or syndromic features	Hennekam-lymphangiectasia-lymphedema syndrome due to FAT4 deficiency	AR	612411
STAT5B	Combined immunodeficiencies with associated or syndromic features	STAT5b deficiency	AR	604260
KMT2D (MLL2)	Combined immunodeficiencies with associated or syndromic features	Kabuki syndrome 1 due to KMT2D deficiency	AD	602113
KDM6A	Combined immunodeficiencies with associated or syndromic features	Kabuki syndrome 2 due to KDM6A deficiency	XL (females may be affected)	300128
ELANE	Congenital defects of phagocyte number or function	Elastase deficiency (SCN1)	AD	130130
GFI1	Congenital defects of phagocyte number or function	GFI 1 deficiency (SCN2)	AD	600871
HAX1	Congenital defects of phagocyte number or function	HAX1 deficiency (Kostmann disease) (SCN3)	AR	605998
G6PC3	Congenital defects of phagocyte number or function	G6PC3 deficiency (SCN4)	AR	611045
VPS45	Congenital defects of phagocyte number or function	VPS45 deficiency (SCN5)	AR	610035
G6PT1	Congenital defects of phagocyte number or function	Glycogen storage disease type 1b	AR	602671
WAS	Congenital defects of phagocyte number or function	X-linked neutropenia/myelodysplasia WAS GOF	XL	300392
LAMTOR2	Congenital defects of phagocyte number or function	P14/LAMTOR2 deficiency	AR	610389
TAZ	Congenital defects of phagocyte number or function	Barth syndrome (3-methylglutaconic aciduria type II)	XL	300394
VPS13B	Congenital defects of phagocyte number or function	Cohen syndrome	AR	607817
USB1	Congenital defects of phagocyte number or function	Clericuzio syndrome (poikiloderma with neutropenia)	AR	613276
JAGN1	Congenital defects of phagocyte number or function	JAGN1 deficiency	AR	616012
CLPB	Congenital defects of phagocyte number or function	3-Methylglutaconic aciduria	AR	616254
CSF3R	Congenital defects of phagocyte number or function	G-CSF receptor deficiency	AR	138971
SMARCD2	Congenital defects of phagocyte number or function	SMARCD2 deficiency	AR	601736
HYOU1	Congenital defects of phagocyte number or function	HYOU1 deficiency	AR	601746
ITGB2	Congenital defects of phagocyte number or function	Leukocyte adhesion deficiency type 1 (LAD1)	AR	600065
SLC35C1	Congenital defects of phagocyte number or function	Leukocyte adhesion deficiency type 2 (LAD2)	AR	605881
FERMT3	Congenital defects of phagocyte number or function	Leukocyte adhesion deficiency type 3 (LAD3)	AR	607901
RAC2	Congenital defects of phagocyte number or function	Rac 2 deficiency	AD	602049
ACTB	Congenital defects of phagocyte number or function	β actin deficiency	AD	102630
FPR1	Congenital defects of phagocyte number or function	Localized juvenile periodontitis	AR	136537
CTSC	Congenital defects of phagocyte number or function	Papillon-Lefèvre syndrome	AR	602365
CEBPE	Congenital defects of phagocyte number or function	Specific granule deficiency	AR	189965
SBDS	Congenital defects of phagocyte number or function	Shwachman-Diamond syndrome	AR	607444
WDR1	Congenital defects of phagocyte number or function	WDR1 deficiency	AR	604734
CFTR	Congenital defects of phagocyte number or function	Cystic fibrosis	AR	602421
DNAJC21	Congenital defects of phagocyte number or function	Schwachman Diamond syndrome due to DNAJC21 deficiency	AR	617048
MKL1	Congenital defects of phagocyte number or function	Neutropenia with combined immune deficiency due to MKL1 deficiency	AR	606078
CYBB	Congenital defects of phagocyte number or function	X-linked chronic granulomatous disease (CGD), gp91phox	XL	300481
CYBA	Congenital defects of phagocyte number or function	Autosomal recessive CGD p22phox	AR	608508
NCF1	Congenital defects of phagocyte number or function	Autosomal recessive CGD p47phox	AR	608512
NCF2	Congenital defects of phagocyte number or function	Autosomal recessive CGD p67phox	AR	608515
NCF4	Congenital defects of phagocyte number or function	Autosomal recessive CGD p40phox	AR	601488
G6PD	Congenital defects of phagocyte number or function	G6PD deficiency class I	XL	305900
GATA2: loss of stem cells	Congenital defects of phagocyte number or function	GATA2 deficiency (MonoMac syndrome)	AD	137295
CSF2RB	Congenital defects of phagocyte number or function	Congenital pulmonary alveolar proteinosis due to CSF2RB mutations	AR	138981
CSF2RA	Congenital defects of phagocyte number or function	Congenital pulmonary alveolar proteinosis due to CSF2RA mutations	XL (pseudoautosomal)	306250
IL12RB1	Defects in intrinsic and innate immunity	IL-12 and IL-23 receptor β1 chain deficiency	AR	601604
IL12B	Defects in intrinsic and innate immunity	IL-12p40 (IL-12 and IL-23) deficiency	AR	161561
IFNGR1	Defects in intrinsic and innate immunity	IFN-γ receptor 1 deficiency	AR/AD	107470
IFNGR2	Defects in intrinsic and innate immunity	IFN-γ receptor 2 deficiency	AR	147569
STAT1	Defects in intrinsic and innate immunity	STAT1 deficiency	AR or AD	600555
CYBB	Defects in intrinsic and innate immunity	Macrophage gp91 phox deficiency	XL	300481
IRF8	Defects in intrinsic and innate immunity	IRF8 deficiency (AD)	AD	601565
IRF8	Defects in intrinsic and innate immunity	IRF8 deficiency (AR)	AR	601565
TYK2	Defects in intrinsic and innate immunity	Tyk2 deficiency	AR	176941
ISG15	Defects in intrinsic and innate immunity	ISG15 deficiency	AR	147571
RORC	Defects in intrinsic and innate immunity	RORc deficiency	AR	602943
JAK1	Defects in intrinsic and innate immunity	JAK1 (LOF)	AR	147795
TMC6	Defects in intrinsic and innate immunity	EVER1 deficiency	AR	605828
TMC8	Defects in intrinsic and innate immunity	EVER2 deficiency	AR	605829
CXCR4	Defects in intrinsic and innate immunity	WHIM (warts, hypogammaglobulinemia, infections, myelokathexis) syndrome	AD GOF	162643
STAT2	Defects in intrinsic and innate immunity	STAT2 deficiency	AR	600556
IRF7	Defects in intrinsic and innate immunity	IRF7 deficiency	AR	605047
IFNAR2	Defects in intrinsic and innate immunity	IFNAR2 deficiency	AR	602376
FCGR3A	Defects in intrinsic and innate immunity	CD16 deficiency	AR	146740
IFIH1	Defects in intrinsic and innate immunity	MDA5 deficiency (LOF)	AR	606951
TLR3	Defects in intrinsic and innate immunity	TLR3 deficiency	AD or AR	603029
UNC93B1	Defects in intrinsic and innate immunity	UNC93B1 deficiency	AR	608204
TRAF3	Defects in intrinsic and innate immunity	TRAF3 deficiency	AD	601896
TICAM1	Defects in intrinsic and innate immunity	TRIF deficiency	AD or AR	607601
TBK1	Defects in intrinsic and innate immunity	TBK1 deficiency	AD	604834
IRF3	Defects in intrinsic and innate immunity	IRF3 deficiency	AD	616532
CARD9	Defects in intrinsic and innate immunity	CARD9 deficiency	AR	607212
IL17RA	Defects in intrinsic and innate immunity	IL-17RA deficiency	AR	605461
IL17RC	Defects in intrinsic and innate immunity	IL-17RC deficiency	AR	610925
IL17F	Defects in intrinsic and innate immunity	IL-17F deficiency	AD	606496
TRAF3IP2	Defects in intrinsic and innate immunity	ACT1 deficiency	AR	607043
IRAK4	Defects in intrinsic and innate immunity	IRAK-4 deficiency	AR	606883
MYD88	Defects in intrinsic and innate immunity	MyD88 deficiency	AR	602170
IRAK1	Defects in intrinsic and innate immunity	IRAK1 deficiency	XL	Not yet attributed
TIRAP	Defects in intrinsic and innate immunity	TIRAP deficiency	AR	614382
RPSA	Defects in intrinsic and innate immunity	Isolated congenital asplenia (ICA) due to RPSA deficiency	AD	271400
HMOX	Defects in intrinsic and innate immunity	Isolated congenital asplenia (ICA) due to HMOX deficiency	AR	141250
APOL1	Defects in intrinsic and innate immunity	Trypanosomiasis	AD	603743
NBAS	Defects in intrinsic and innate immunity	Acute liver failure due to NBAS deficiency	AR	608025
RANBP2	Defects in intrinsic and innate immunity	Acute necrotizing encephalopathy	AD	601181
CLCN7	Defects in intrinsic and innate immunity	CLCN7 deficiency associated osteopetrosis	AR	602727
SNX10	Defects in intrinsic and innate immunity	SNX10 deficiency associated osteopetrosis	AR	614780
OSTM1	Defects in intrinsic and innate immunity	OSTM1 deficiency associated osteopetrosis	AR	607649
PLEKHM1	Defects in intrinsic and innate immunity	PLEKHM1 deficiency associated osteopetrosis	AR	611466
TCIRG1	Defects in intrinsic and innate immunity	TCIRG1 deficiency associated osteopetrosis	AR	604592
TNFRSF11A	Defects in intrinsic and innate immunity	TNFRSF11A deficiency associated osteopetrosis	AR	603499
TNFSF11	Defects in intrinsic and innate immunity	TNFSF11 deficiency associated osteopetrosis	AR	602642
NCSTN	Defects in intrinsic and innate immunity	NCSTN deficiency hidradenitis suppurativa	AD	605254
PSEN	Defects in intrinsic and innate immunity	PSEN deficiency hidradenitis suppurativa	AD	104311
PSENEN	Defects in intrinsic and innate immunity	PSENEN deficiency hidradenitis suppurativa	AD	607632
TREX1	Autoinflammatory disorders	TREX1 deficiency, Aicardi-Goutieres syndrome 1 (AGS1)	AR or AD	606609
RNASEH2B	Autoinflammatory disorders	RNASEH2B deficiency, AGS2	AR	610326
RNASEH2C	Autoinflammatory disorders	RNASEH2C deficiency, AGS3	AR	610330
RNASEH2A	Autoinflammatory disorders	RNASEH2A deficiency, AGS4	AR	606034
SAMHD1	Autoinflammatory disorders	SAMHD1 deficiency, AGS5	AR	606754
ADAR1	Autoinflammatory disorders	ADAR1 deficiency, AGS6	AR	146920
IFIH1 (GOF)	Autoinflammatory disorders	Aicardi-Goutieres syndrome 7 (AGS7)	AD	606951
ACP5	Autoinflammatory disorders	Spondyloenchondro-dysplasia with immune dysregulation (SPENCD)	AR	171640
TMEM173	Autoinflammatory disorders	STING-associated vasculopathy, infantile-onset	AR	612374
POLA1	Autoinflammatory disorders	X-linked reticulate pigmentary disorder	XL	301220
USP18	Autoinflammatory disorders	USP18 deficiency	AR	607057
PSMB8	Autoinflammatory disorders	CANDLE (chronic atypical neutrophilic dermatitis with lipodystrophy)	AR and AD	256040
DDX58	Autoinflammatory disorders	Singleton-Merten syndrome	AD	609631
MEFV	Autoinflammatory disorders	Familial Mediterranean fever	AR or AD	249100
MVK	Autoinflammatory disorders	Mevalonate kinase deficiency (Hyper IgD syndrome)	AR	260920
NLRP3 (also called NALP3 CIAS1 or PYPAF1)	Autoinflammatory disorders	Muckle-Wells syndrome	AD GOF	191900
NLRP3	Autoinflammatory disorders	Familial cold autoinflammatory syndrome 1	AD GOF	120100
NLRP12	Autoinflammatory disorders	Familial cold autoinflammatory syndrome 2	AD GOF	611762
NLRP3	Autoinflammatory disorders	Neonatal onset multisystem inflammatory disease (NOMID) or chronic infantile neurologic cutaneous and articular syndrome (CINCA)	AD GOF	607115
NLRC4	Autoinflammatory disorders	NLRC4-MAS (macrophage activating syndrome) or familial cold autoinflammatory syndrome 4	AD GOF	616050
PLCG2	Autoinflammatory disorders	PLAID (PLCγ2 associated antibody deficiency and immune dysregulation) or familial cold autoinflammatory syndrome 3 or APLAID (c2120A>C)	AD GOF	614468
NLRP1	Autoinflammatory disorders	NLRP1 deficiency	AR	606579
TNFRSF1A	Autoinflammatory disorders	TNF receptor-associated periodic syndrome (TRAPS)	AD	142680
PSTPIP1 (also called C2BP1)	Autoinflammatory disorders	Pyogenic sterile arthritis, pyoderma gangrenosum, acne (PAPA) syndrome, hyperzincemia, and hypercalprotectinemia	AD	604416
NOD2 (also called CARD15)	Autoinflammatory disorders	Blau syndrome	AD	186580
ADAM17	Autoinflammatory disorders	ADAM17 deficiency	AR	614328
LPIN2	Autoinflammatory disorders	Chronic recurrent multifocal osteomyelitis and congenital dyserythropoietic anemia (Majeed syndrome)	AR	609628
IL1RN	Autoinflammatory disorders	DIRA (deficiency of the interleukin-1 receptor antagonist)	AR	612852
IL36RN	Autoinflammatory disorders	DITRA (deficiency of IL-36 receptor antagonist)	AR	614204
SLC29A3	Autoinflammatory disorders	SLC29A3 mutation	AR	602782
CARD14	Autoinflammatory disorders	CAMPS (CARD14 mediated psoriasis)	AD	602723
SH3BP2	Autoinflammatory disorders	Cherubism	AD	118400
COPA	Autoinflammatory disorders	COPA defect	AD	6011924
OTULIN	Autoinflammatory disorders	Otulipenia/ORAS	AR	615712
TNFAIP3	Autoinflammatory disorders	A20 deficiency	AD LOF	616744
CECR1	Autoinflammatory disorders	ADA2 deficiency	AR	607575
AP1S3	Autoinflammatory disorders	AP1S3 deficiency	AR	615781
C1QA	Complement deficiencies	C1q deficiency due to defects in C1QA	AR	120550
C1QB	Complement deficiencies	C1q deficiency due to defects in C1QB	AR	120570
C1QC	Complement deficiencies	C1q deficiency due to defects in C1QC	AR	120575
C1R	Complement deficiencies	C1r deficiency	AR	613785
C1S	Complement deficiencies	C1s deficiency	AR	120580
C4A + C4B	Complement deficiencies	Complete C4 deficiency	AR	120810
C2	Complement deficiencies	C2 deficiency	AR	217000
C3	Complement deficiencies	C3 deficiency (LOF)/ GOF	AR or AD	120700
C5	Complement deficiencies	C5 deficiency	AR	120900
C6	Complement deficiencies	C6 deficiency	AR	217050
C7	Complement deficiencies	C7 deficiency	AR	217070
C8A	Complement deficiencies	C8α deficiency	AR	120950
C8G	Complement deficiencies	C8γ deficiency	AR	120930
C8B:	Complement deficiencies	C8β-deficiency	AR	120960
C9	Complement deficiencies	C9 deficiency	AR	120940
MASP2	Complement deficiencies	MASP2 deficiency	AR	605102
FCN3	Complement deficiencies	Ficolin 3 deficiency	AR	604973
SERPING1	Complement deficiencies	C1 inhibitor deficiency	AD	606860
CFB	Complement deficiencies	Factor B GOF	AR or AD	138470
CFD	Complement deficiencies	Factor D deficiency	AR	134350
CFP	Complement deficiencies	Properdin deficiency	XLR	300383
CFI	Complement deficiencies	Factor I deficiency	AR or AD	217030
CFH	Complement deficiencies	Factor H deficiency	AR or AD	134370
CFHR1-5	Complement deficiencies	Factor H-related protein deficiencies	AR or AD	134371, 600889, 605336, 605337, 608593
THBD	Complement deficiencies	Thrombomodulin deficiency	AD	188040
CD46	Complement deficiencies	Membrane cofactor protein (CD46) deficiency	AD	120920
CD59	Complement deficiencies	Membrane attack Complex inhibitor (CD59) deficiency	AR	107271
CD55	Complement deficiencies	CD55 deficiency (CHAPEL disease)	AR	125240
